# Supplementary material for: Measuring cystic fibrosis drug responses in organoids derived from 2D differentiated nasal epithelia
Source: Life Sci Alliance. 2022 Aug 3;5(12):e202101320. doi: 10.26508/lsa.202101320 (PMC9351388; doi:10.26508/lsa.202101320)
Supplement: Supplementary file 5 [file LSA-2021-01320_TableS2.xlsx]

## Sheet: Sheet1
Reagent	Concentration
Bronchial epithelial cell medium-basal (BEpiCM-b)	50% (v/v)
Advanced DMEM F12	23.5 % (v/v)
B-27 Supplement, serum free	2 % (v/v)
GlutaMAX Supplement	1 % (v/v)
HEPES (1 M)	10 mM
(±)-Epinephrine hydrochloride	0.5 μg/mL
Hydrocortisone	0.5 μg/mL
3,3′,5-Triiodo-L-thyronine sodium salt	100 nM
N-Acetyl-L-cysteine	1.25 mM
Nicotinamide	5 mM
SB 202190 (p38i)	500 nM
DMH-1 (BMPi)	1 μM
A83-01 (TGF-βi)	1 μM
Y-27632 (ROCKi)	5 μM
DAPT (NOTCHi; expansion medium)	5 μg/mL
Recombinant human FGF-7	25 ng/mL
Recombinant human FGF-10	100 ng/mL
Recombinant human EGF	5 ng/mL
Recombinant human HGF	25 ng/mL
Rspondin 1 conditioned medium (from Rspo1 cells Cultrex®)	20 % (v/v)
Penicillin-Streptomycin	1 % (v/v)
Primocin	100 μg/mL
Amphotericin B (isolation medium)	250 μg/mL
Gentamicin (isolation medium)	50 μg/mL
Vancomycin (isolation medium)	50 μg/mL
