# Supplementary material for: Measuring cystic fibrosis drug responses in organoids derived from 2D differentiated nasal epithelia
Source: Life Sci Alliance. 2022 Aug 3;5(12):e202101320. doi: 10.26508/lsa.202101320 (PMC9351388; doi:10.26508/lsa.202101320)
Supplement: Supplementary file 7 [file LSA-2021-01320_TableS4.xlsx]

## Sheet: Sheet1
Reagent	Concentration
Advanced DMEM F12	95.5% (v/v)
B-27 Supplement, serum free	2 % (v/v)
GlutaMAX Supplement	1 % (v/v)
HEPES	10 mM
N-Acetyl-L-cysteine	1.25 mM
Nicotinamide	5 mM
SB 202190 (p38i)	500 nM
A83-01 (TGF-βi)	1 μM
Y-27632 (ROCKi)	5 μM
Penicillin-Streptomycin	1 % (v/v)
Primocin	100 μg/mL
Recombinant Neuregulin-1β	0.5 nM
(In optimized conditions)
Recombinant Interleukin-1β	10 ng/ml
(In optimized conditions)
