# Supplementary material for: Measuring cystic fibrosis drug responses in organoids derived from 2D differentiated nasal epithelia
Source: Life Sci Alliance. 2022 Aug 3;5(12):e202101320. doi: 10.26508/lsa.202101320 (PMC9351388; doi:10.26508/lsa.202101320)
Supplement: Supplementary file 8 [file LSA-2021-01320_TableS5.xlsx]

## Sheet: Sheet1
Gene	Forward primer (5’- 3’)	Reverse primer (5’- 3’)
CFTR	CAACATCTAGTGAGCAGTCAGG	CCCAGGTAAGGGATGTATTGTG
ANO1	AGGATTCCTTTTTCGACAGCAA	CGTTTTCACCGTTGTAGTCTCC
SLC26A9	GTTCAGAAATTTAGGGCCTCCT	AGGCACCTTGCTTTATCGGG
SPDEF	ATGAAAGAGCGGACTTCACCT	CTGGTCGAGGCACAGTAGTG
FOXJ1	GGAGGGGACGTAAATCCCTA	TTGGTCCCAGTAGTTCCAGC
ATP5B	TCACCCAGGCTGGTTCAGA	AGTGGCCAGGGTAGGCTGAT
RPL13A	AAGGTGGTGGTCGTACGCTGTG	CGGGAAGGGTTGGTGTTCATCC
